## Correction

# Correction: Spatio-Temporal Patterns of Beaked Whale Echolocation Signals in the North Pacific

## The PLOS ONE Staff

There are errors in the Funding section. The correct Funding information is as follows:

Funding provided by United States Office of Naval Research, M. Weise (<http://www.onr.navy.mil/en/Science-Technology/Departments/Code-32/All-Programs/Atmosphere-Research-322/Marine-Mammals-Biology.aspx>), United States Navy Living Marine Resources, B. Gisiner and F. Stone (<http://www.lmr.navy.mil>), United States Pacific Fleet, C. Johnson (<https://portal.navfac.navy.mil>), Pacific Life Foundation, B. Haskell ([http://www.pacificlife.com/PL/FoundationCommunity/Overview/Corp\\_PLF\\_Home.htm](http://www.pacificlife.com/PL/FoundationCommunity/Overview/Corp_PLF_Home.htm)), Ocean Foundation, M. Spaulding (<http://www.oceanfdn.org>), Naval Postgraduate School, C. Collins and J. Joseph (<http://www.nps.edu>), National Oceanographic Partnership Program (<http://www.nopp.org>), the Bureau of Ocean Energy Management, J. Lewandowski and J. Price (<http://www.boem.gov>), Pacific Islands Fisheries Science Center (PIFSC), National Oceanic and Atmospheric Administration (<http://www.pifsc.noaa.gov/cetacean>). The funders (except for PIFSC, EMO) had no role in study design, data collection and analysis, decision to publish, or preparation of the manuscript.

## Reference

1. Baumann-Pickering S, Roch MA, Brownell Jr RL, Simonis AE, McDonald MA, et al. (2014) Spatio-Temporal Patterns of Beaked Whale Echolocation Signals in the North Pacific. PLoS ONE 9(1): e86072. doi:10.1371/journal.pone.0086072

**Citation:** The PLOS ONE Staff (2014) Correction: Spatio-Temporal Patterns of Beaked Whale Echolocation Signals in the North Pacific. PLoS ONE 9(3): e91383. doi:10.1371/journal.pone.0091383

**Published:** March 7, 2014

**Copyright:** © 2014 The PLOS ONE Staff. This is an open-access article distributed under the terms of the Creative Commons Attribution License, which permits unrestricted use, distribution, and reproduction in any medium, provided the original author and source are credited.
